# Supplementary material
Source: HighWire-hosted journal article supplement (http://molpharm.aspetjournals.org/highwire/filestream/77232/field_highwire_adjunct_files/2/Supplemental_Figure_3.pdf)
Supplement: Supplemental_Figure_3.pdf [file Supplemental_Figure_3.pdf]

## Supplemental Figure 3

### Sequential cytoprotective responses to Sigma1 ligand induced endoplasmic reticulum stress

Joel M. Schrock, Christina M. Spino, Charles G. Longen, Stacy M. Stabler, Jacqueline C. Marino, Gavril W. Pasternak, Felix J. Kim

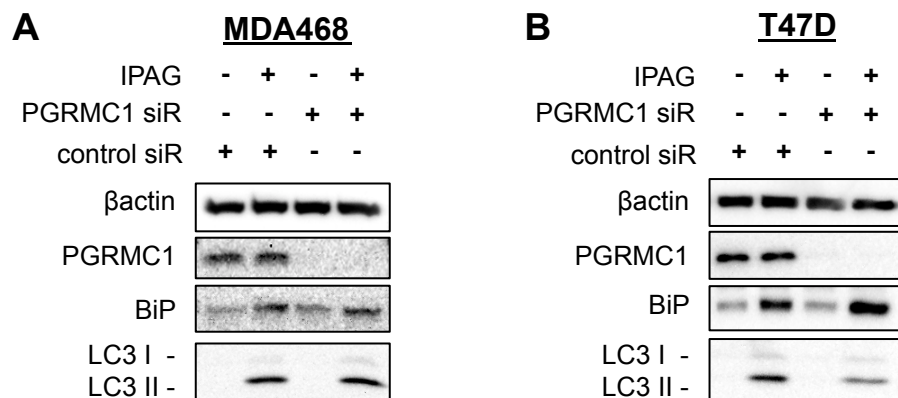

**Supplemental Figure 3. Effect of PGRMC1 RNAi on IPAG responsive UPR and autophagy.** Progesterone receptor membrane component 1 (PGRMC1) was knocked down subsequent to two rounds of transfection with control or PGRMC1 siRNA (siR). Approximately 96 hours following the first siRNA transfection, the indicated breast adenocarcinoma cell lines were treated for 24 hours with 10 $\mu$ M IPAG. MDA468 shown in A.) and T47D cells shown in B.). Shown are immunoblots demonstrating increased levels of BiP (UPR marker) and LC3II (autophagosome marker).
